# Supplementary figures and images for: A sharp lithosphere–asthenosphere boundary imaged beneath eastern North America
Source: Springer Nature journal article supplement (doi:10.1038/nature03904), 2005-07-27

# Supplementary Figure 2

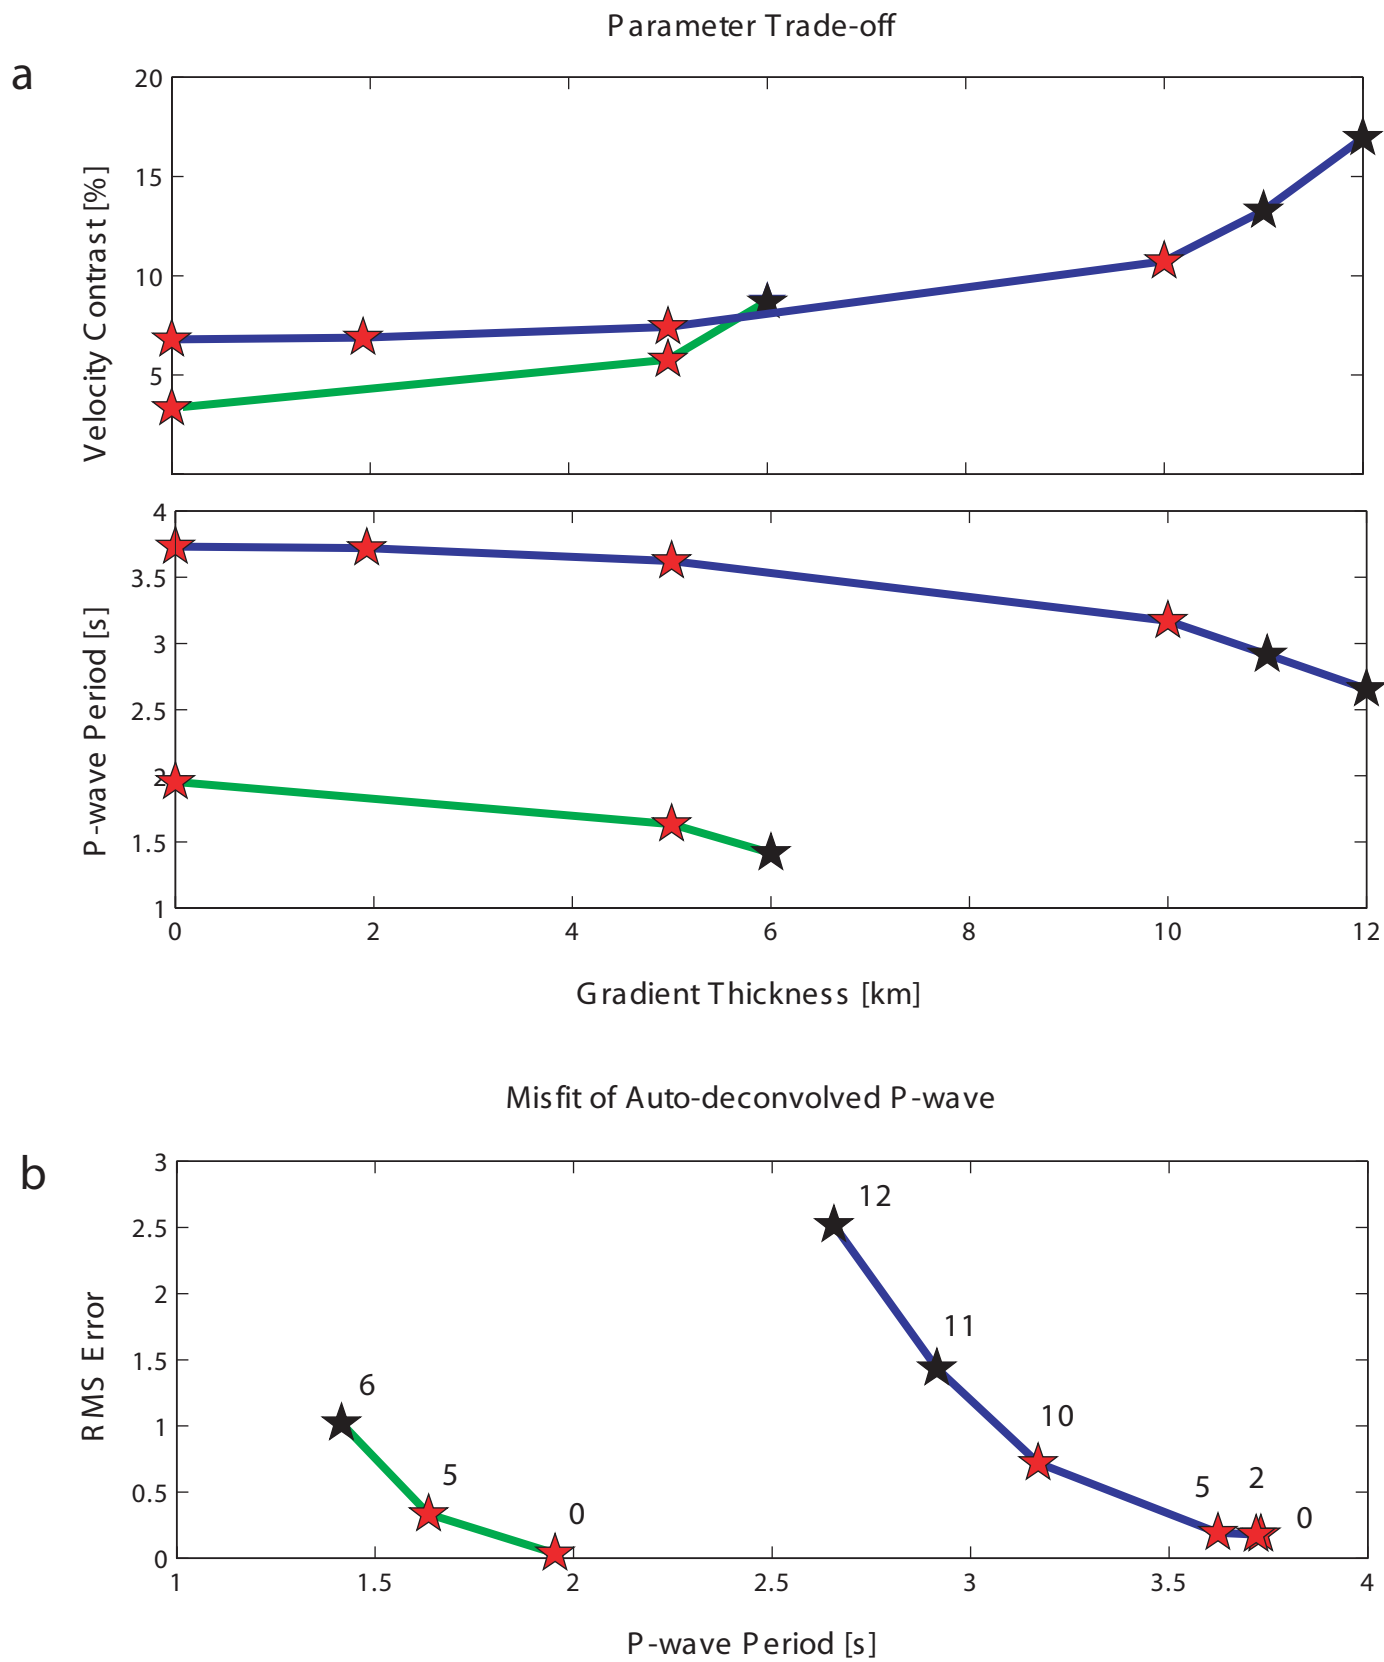

Supplement: nature03904-s2.pdf [file nature03904-s2.pdf]
